# Supplementary material for: Hierarchical microtubes constructed using Fe-doped MoS2 nanosheets for biosensing applications
Source: Royal Society of Chemistry journal article supplement (doi:10.1039/d2dt02309a), 2022-01-01
Supplement: d2dt02309a1.pdf [file d2dt02309a1.pdf]

## Supplementary information

### **Hierarchical Microtubes Constructed by Fe-doped MoS<sub>2</sub> nanosheets for Biosensing Application**

Zhiwen Shen<sup>a</sup>, Suping Han<sup>b\*</sup>, Jingli Xu<sup>a</sup>, Xue-Bo Yin<sup>a</sup>, Min Zhang<sup>a\*</sup>

<sup>a</sup>College of Chemistry and Chemical Engineering, Shanghai University of Engineering Science, Shanghai 201620, China. zhangmin@sues.edu.cn

<sup>b</sup>Department of Pharmacy, Shandong Medical College, No. 5460 Erhuannanlu Road, Jinan 250002, China, supinghan@163.com

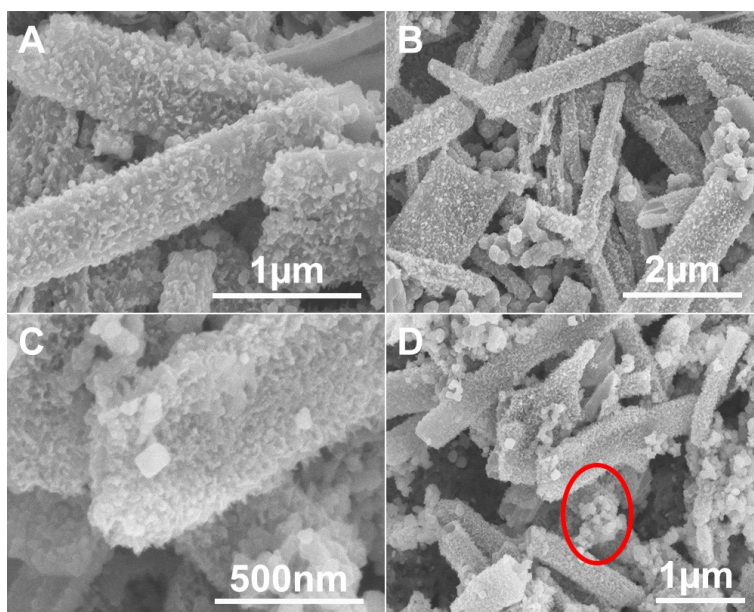

Fig. S1 SEM images of as-synthesized products with different mass ratios of  $\text{MoO}_3@FeOOH$  to ammonium tetrathiomolybdate. (a) 60 mg : 10 mg ; (b) 60 mg : 30 mg

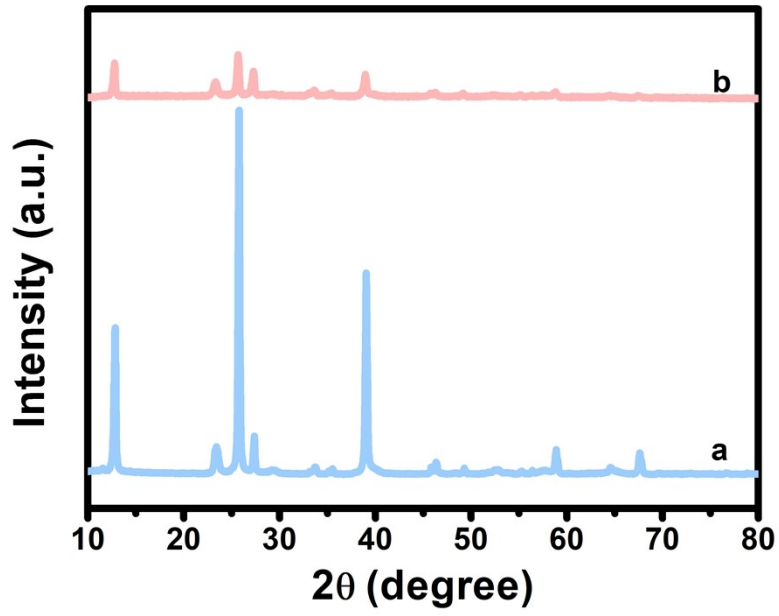

Fig. S2 X-ray diffraction patterns of  $\text{MoO}_3$ (a) and  $\text{MoO}_3@$ FeOOH(b).

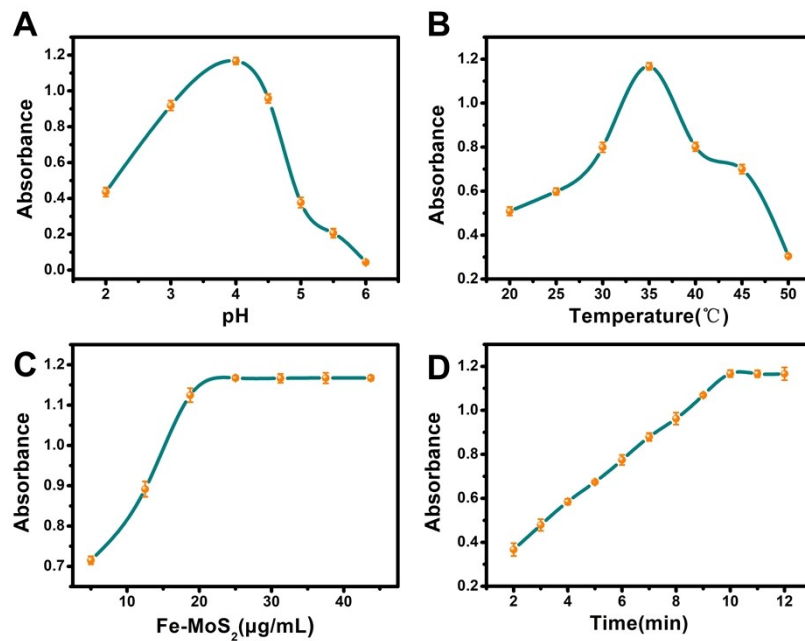

Fig. S3. (A) The pH dependence of the peroxidase-like activity. (B) The temperature (20 °C-50 °C) is dependent on the peroxidase-like activity. (C) The material concentration (5-45 μg/mL) depends on the peroxidase-like activity. (D) The reaction time (2 min-12 min) is dependent on the peroxidase-like activity. The error bars shown represent the standard error derived from three repeated measurements.

**Table S1** The apparent kinetic parameters ( $K_m$  and  $V_{max}$ ) of Fe-MoS<sub>2</sub> catalysts were compared with other simulated enzymes.

| Enzyme mimics                                       | $K_m$ (mM) |                               | $V_{max}$ ( $10^{-8} \text{ Ms}^{-1}$ ) |                               | Ref       |
|-----------------------------------------------------|------------|-------------------------------|-----------------------------------------|-------------------------------|-----------|
|                                                     | TMB        | H <sub>2</sub> O <sub>2</sub> | TMB                                     | H <sub>2</sub> O <sub>2</sub> |           |
| Fe-MoS <sub>2</sub>                                 | 0.0164     | 0.046                         | 9.44                                    | 4.97                          | This work |
| HRP                                                 | 0.434      | 3.7                           | 10                                      | 8.71                          | 1         |
| Fe <sub>3</sub> O <sub>4</sub> nanoparticles        | 0.098      | 3.44                          | 154                                     | 9.78                          | 2         |
| MoS <sub>2</sub>                                    | 2.668      | 1.809                         | 1.501                                   | 1.642                         | 3         |
| Fe <sub>3</sub> O <sub>4</sub> /MoS <sub>2</sub>    | 0.806      | 0.238                         | 141.3                                   | 37.8                          | 4         |
| MoS <sub>2</sub> -Pt <sub>74</sub> Ag <sub>26</sub> | 0.386      | 25.71                         | 3.22                                    | 7.29                          | 5         |
| MoS <sub>2</sub> -PPy-Pd                            | 0.93       | 6.4                           | –                                       | –                             | 6         |
| Fe-MoS <sub>2</sub>                                 | 0.387      | 0.0638                        | 950                                     | 438.5                         | 7         |

**Table S2 Comparison of analysis from various reports with different chosen materials and their respective LOD, and linear range values toward the detection of GSH**

| <b>Material</b>                       | <b>Detection method</b> | <b>LR(<math>\mu</math>M)</b> | <b>LOD(<math>\mu</math>M)</b> | <b>Ref</b> |
|---------------------------------------|-------------------------|------------------------------|-------------------------------|------------|
| Fe-MoS <sub>2</sub>                   | Colorimetric            | 1-30                         | 0.577                         | 7          |
| MoS <sub>2</sub> QDs/MnO <sub>2</sub> | Colorimetric            | 2.0-300.0                    | 0.5                           | 8          |
| EDC/CQDs                              | Colorimetric            | 1.0-50.0                     | 0.943                         | 9          |
| SWNTs/GCE                             | Electrochemical         | 1.0-500                      | 0.5                           | 10         |
| AgNPs(TMSPED)-rGO                     | Electrochemical         | 0.1-2.75                     | 0.28                          | 11         |
| MWNTs/CoQ10/IL                        | Electrochemical         | 0.2-4                        | 0.32                          | 12         |

## References

1. N. R. Nirala, S. Pandey, A. Bansal, V. K. Singh, B. Mukherjee, P. S. Saxena and A. Srivastava, *Biosensors and Bioelectronics*, 2015, **74**, 207-213.
2. L. Gao, J. Zhuang, L. Nie, J. Zhang, Y. Zhang, N. Gu, T. Wang, J. Feng, D. Yang and S. Perrett, *Nature nanotechnology*, 2007, **2**, 577-583.
3. W. Dong, G. Chen, X. Hu, X. Zhang, W. Shi and Z. Fu, *Sensors and Actuators B: Chemical*, 2020, **305**, 127530.
4. V. Nandwana, W. Huang, Y. Li and V. P. Dravid, *ACS Applied Nano Materials*, 2018, **1**, 1949-1958.
5. S. Cai, Q. Han, C. Qi, Z. Lian, X. Jia, R. Yang and C. Wang, *Nanoscale*, 2016, **8**, 3685-3693.
6. M. Chi, Y. Zhu, L. Jing, C. Wang and X. Lu, *Analytica Chimica Acta*, 2018, **1035**, 146-153.
7. P. Singh, R. P. Ojha, S. Kumar, A. K. Singh and R. Prakash, *Materials Chemistry and Physics*, 2021, **267**, 124684.
8. W. Zeng, L. Liu, Y. Yi, Y. Wu, N. Sun, B. Lv and G. Zhu, *Microchemical Journal*, 2019, **150**, 104149.
9. J. Pan, Z. Zheng, J. Yang, Y. Wu, F. Lu, Y. Chen and W. Gao, *Talanta*, 2017, **166**, 1-7.
10. L. Zhao, L. Zhao, Y. Miao and C. Zhang, *Electrochimica Acta*, 2016, **206**, 86-98.
11. V. Vinoth, J. J. Wu, A. M. Asiri and S. Anandan, *Ultrasonics sonochemistry*, 2017, **39**, 363-373.
12. J. Ru, J. Du, D.-D. Qin, B.-M. Huang, Z.-H. Xue, X.-B. Zhou and X.-Q. Lu, *Talanta*, 2013, **110**, 15-20.
